# Supplementary material
Source: MDPI journal article supplement (https://www.mdpi.com/1996-1073/16/21/7278)
Supplement: s1 [file s1]

# An Experimental and Detailed Kinetics Modeling Study of Norbornadiene in Hydrogen and Methane Mixtures: Ignition Delay Time and Spectroscopic CO Measurements

*Matthew G. Sandberg\*, Claire M. Grégoire, Darryl J. Mohr, Olivier Mathieu and Eric L. Petersen*

## Supplementary Material

1/ Ignition delay times for 100% H<sub>2</sub> oxidation (Mixture 1),  $\phi = 1.0$ , T = 1014 – 1459 K, P = 0.93 – 7.51 atm

| T5 (K) | P5 (atm) | OH* IDTs ( $\mu$ s) |
|--------|----------|---------------------|
| 1014   | 1.87     | 974                 |
| 1052   | 1.76     | 578                 |
| 1098   | 1.20     | 578                 |
| 1125   | 1.74     | 353                 |
| 1127   | 1.12     | 520                 |
| 1127   | 1.12     | 466                 |
| 1164   | 1.10     | 418                 |
| 1167   | 1.06     | 398                 |
| 1201   | 1.66     | 233                 |
| 1218   | 1.00     | 293                 |
| 1258   | 0.97     | 260                 |
| 1266   | 0.99     | 237                 |
| 1283   | 1.55     | 147                 |
| 1309   | 1.00     | 199                 |
| 1316   | 1.05     | 191                 |
| 1317   | 0.93     | 161                 |
| 1337   | 1.54     | 112                 |
| 1459   | 1.00     | 108                 |
| 1080   | 7.51     | 837                 |
| 1093   | 7.47     | 389                 |
| 1095   | 7.08     | 327                 |
| 1107   | 7.08     | 184                 |
| 1139   | 7.17     | 154                 |
| 1140   | 6.95     | 143                 |

2/ Ignition delay times for 98/2% H<sub>2</sub>/NBD oxidation (Mixture 3),  $\phi = 1.0$ , T = 1151 – 1404 K, P = 0.96 – 7.08 atm

| T5 (K) | P5 (atm) | OH* IDTs ( $\mu$ s) |
|--------|----------|---------------------|
| 1169   | 1.02     | 3109                |
| 1194   | 1.12     | 1740                |
| 1208   | 1.02     | 1758                |
| 1220   | 1.24     | 1374                |
| 1220   | 0.99     | 1332                |
| 1258   | 1.00     | 723                 |
| 1290   | 0.96     | 501                 |
| 1309   | 1.17     | 365                 |
| 1336   | 1.07     | 301                 |
| 1375   | 1.00     | 220                 |
| 1404   | 0.98     | 145                 |
| 1151   | 7.08     | 1941                |
| 1163   | 6.82     | 1437                |
| 1165   | 6.58     | 1472                |
| 1173   | 6.61     | 1121                |
| 1194   | 6.57     | 790                 |
| 1199   | 6.77     | 754                 |
| 1214   | 6.32     | 662                 |
| 1217   | 6.66     | 579                 |
| 1225   | 6.46     | 381                 |
| 1228   | 6.33     | 583                 |
| 1233   | 6.68     | 469                 |
| 1252   | 6.55     | 256                 |
| 1259   | 6.44     | 217                 |
| 1265   | 6.33     | 266                 |
| 1305   | 6.34     | 154                 |

3/ Ignition delay times for 100% CH<sub>4</sub> (Mixture 2),  $\phi = 0.99$ , T = 1846 – 2227 K, P = 0.93 – 1.05 atm

| T5 (K) | P5 (atm) | OH* IDTs ( $\mu$ s) |
|--------|----------|---------------------|
| 1846   | 1.04     | 1045                |
| 1901   | 1.05     | 820                 |
| 1961   | 1.05     | 532                 |
| 2017   | 1.04     | 348                 |
| 2023   | 0.97     | 320                 |
| 2093   | 1.00     | 179                 |
| 2118   | 1.00     | 156                 |
| 2134   | 0.96     | 167                 |
| 2227   | 0.93     | 102                 |

4/ Ignition delay times for 99/1% CH<sub>4</sub>/NBD oxidation (Mixture 4),  $\phi = 1.01$ , T = 1838 – 2107 K, P = 0.95 – 1.05 atm

| T5 (K) | P5 (atm) | OH* IDTs ( $\mu$ s) |
|--------|----------|---------------------|
| 1838   | 1.03     | 926                 |
| 1848   | 0.99     | 777                 |
| 1879   | 1.03     | 710                 |
| 1908   | 1.04     | 497                 |
| 1933   | 1.04     | 498                 |
| 1936   | 1.03     | 461                 |
| 1943   | 1.05     | 501                 |
| 1971   | 1.03     | 356                 |
| 2006   | 1.00     | 273                 |
| 2054   | 0.95     | 194                 |
| 2061   | 0.98     | 203                 |
| 2107   | 0.95     | 150                 |

5/ Ignition delay times for 98/2% CH<sub>4</sub>/NBD oxidation (Mixture 5),  $\phi = 1.0$ , T = 1778 – 2091 K, P = 0.97 – 1.08 atm

| T5 (K) | P5 (atm) | OH* IDTs ( $\mu$ s) |
|--------|----------|---------------------|
| 1778   | 1.03     | 1161                |
| 1815   | 1.06     | 806                 |
| 1842   | 1.06     | 718                 |
| 1879   | 1.07     | 560                 |
| 1935   | 1.03     | 379                 |
| 1944   | 1.06     | 361                 |
| 1979   | 1.01     | 276                 |
| 2002   | 0.97     | 250                 |
| 2033   | 1.08     | 220                 |
| 2091   | 0.97     | 160                 |

6/ CO time-history profiles: methane oxidation,  $\phi = 0.99$ ,  $T = 1846 - 2316$  K,  $P = 0.90 - 1.05$  atm

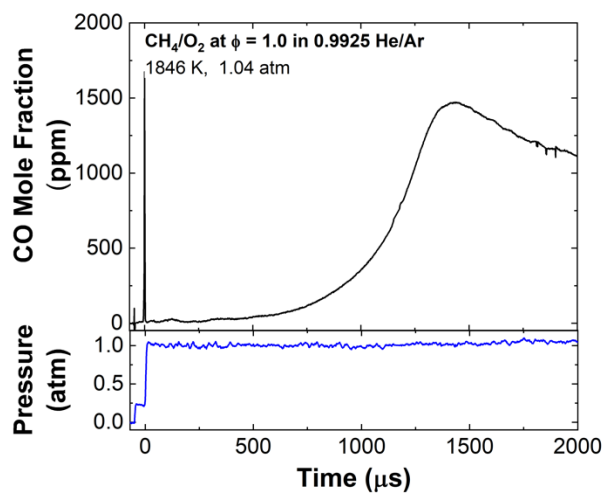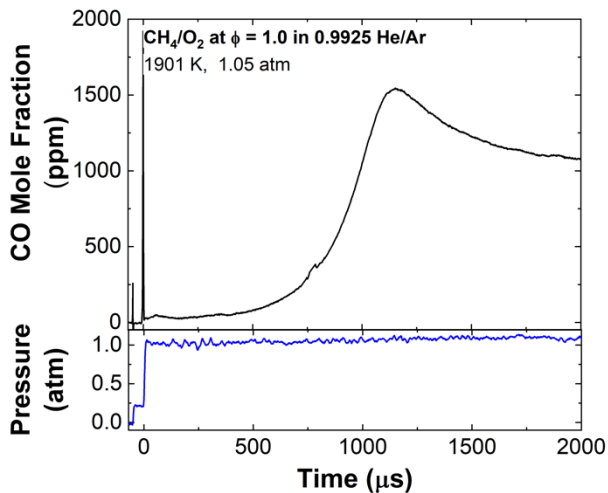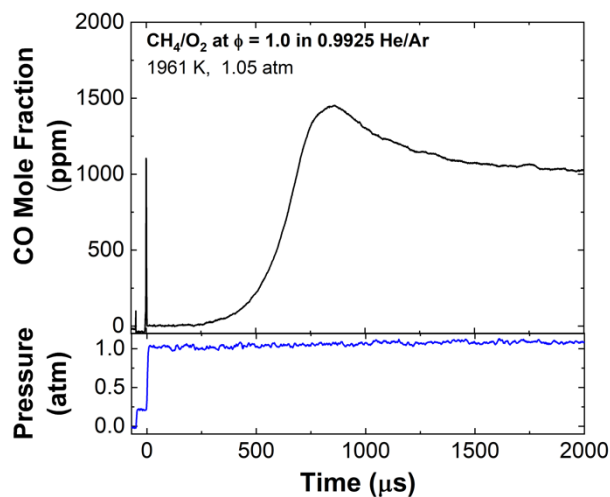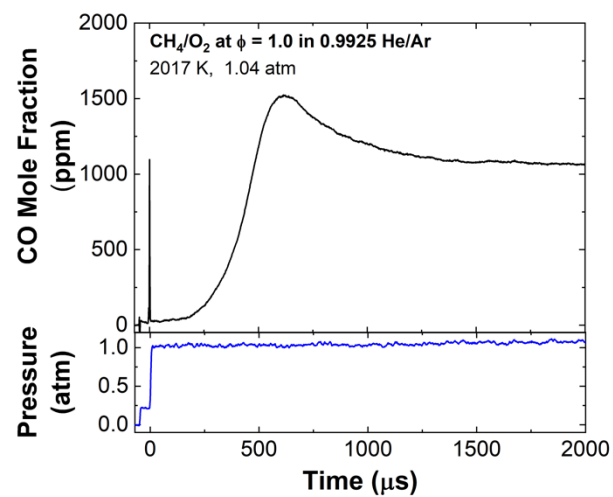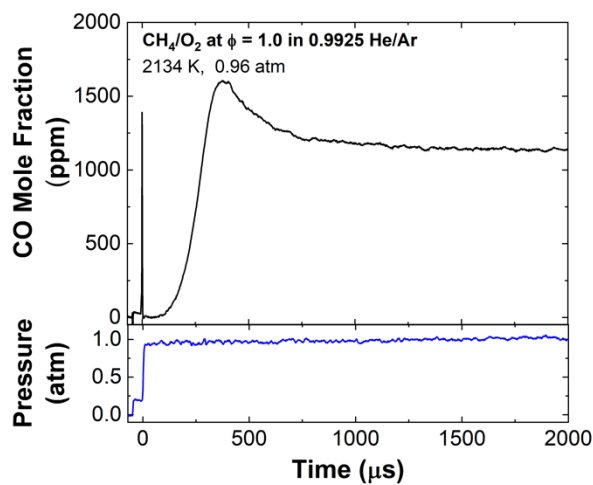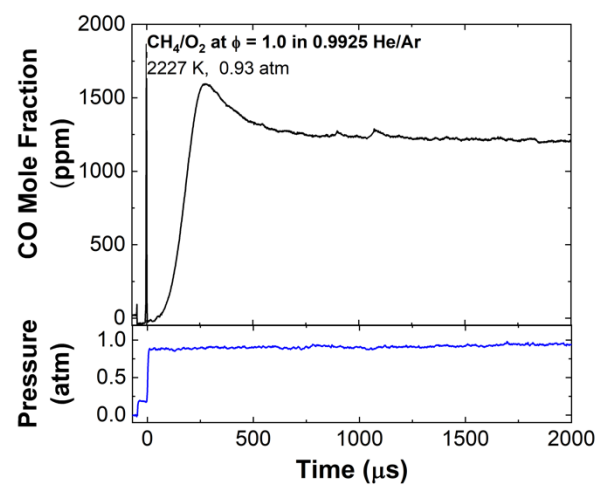

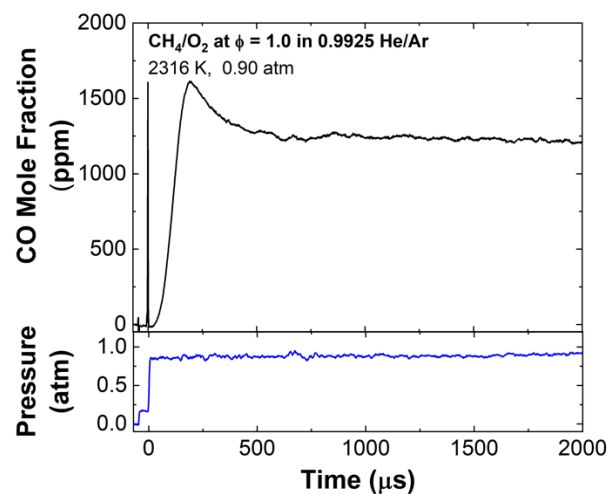

**Figure S1.** Experimental CO time-history profiles for the oxidation of CH<sub>4</sub> at  $\phi = 0.99$  in 99.25% He/Ar.

7/ CO time-history profiles: methane oxidation + 1% NBD,  $\phi = 1.01$ ,  $T = 1838 - 2174$  K,  $P = 0.95 - 1.03$  atm

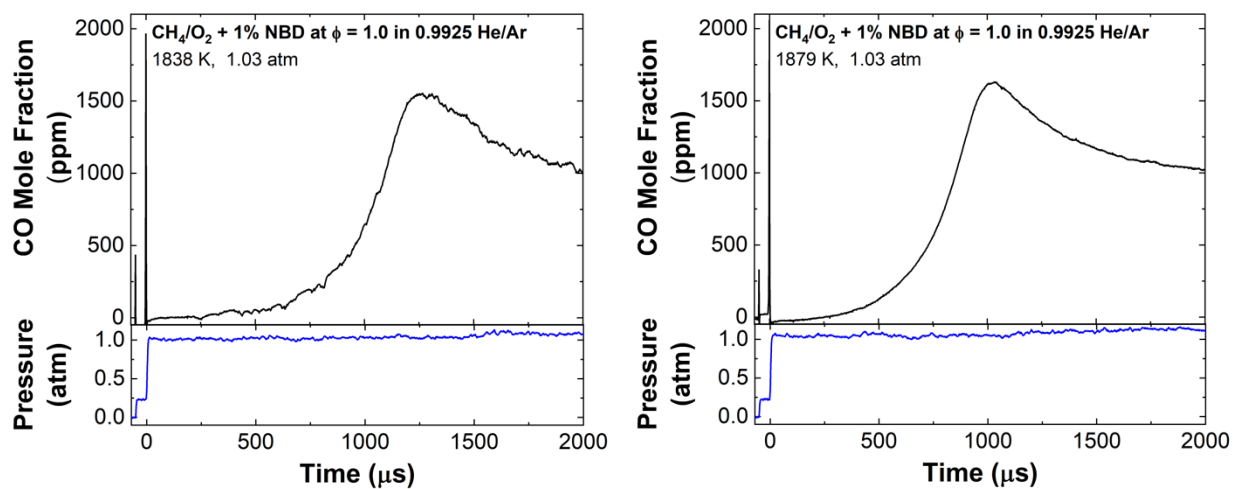

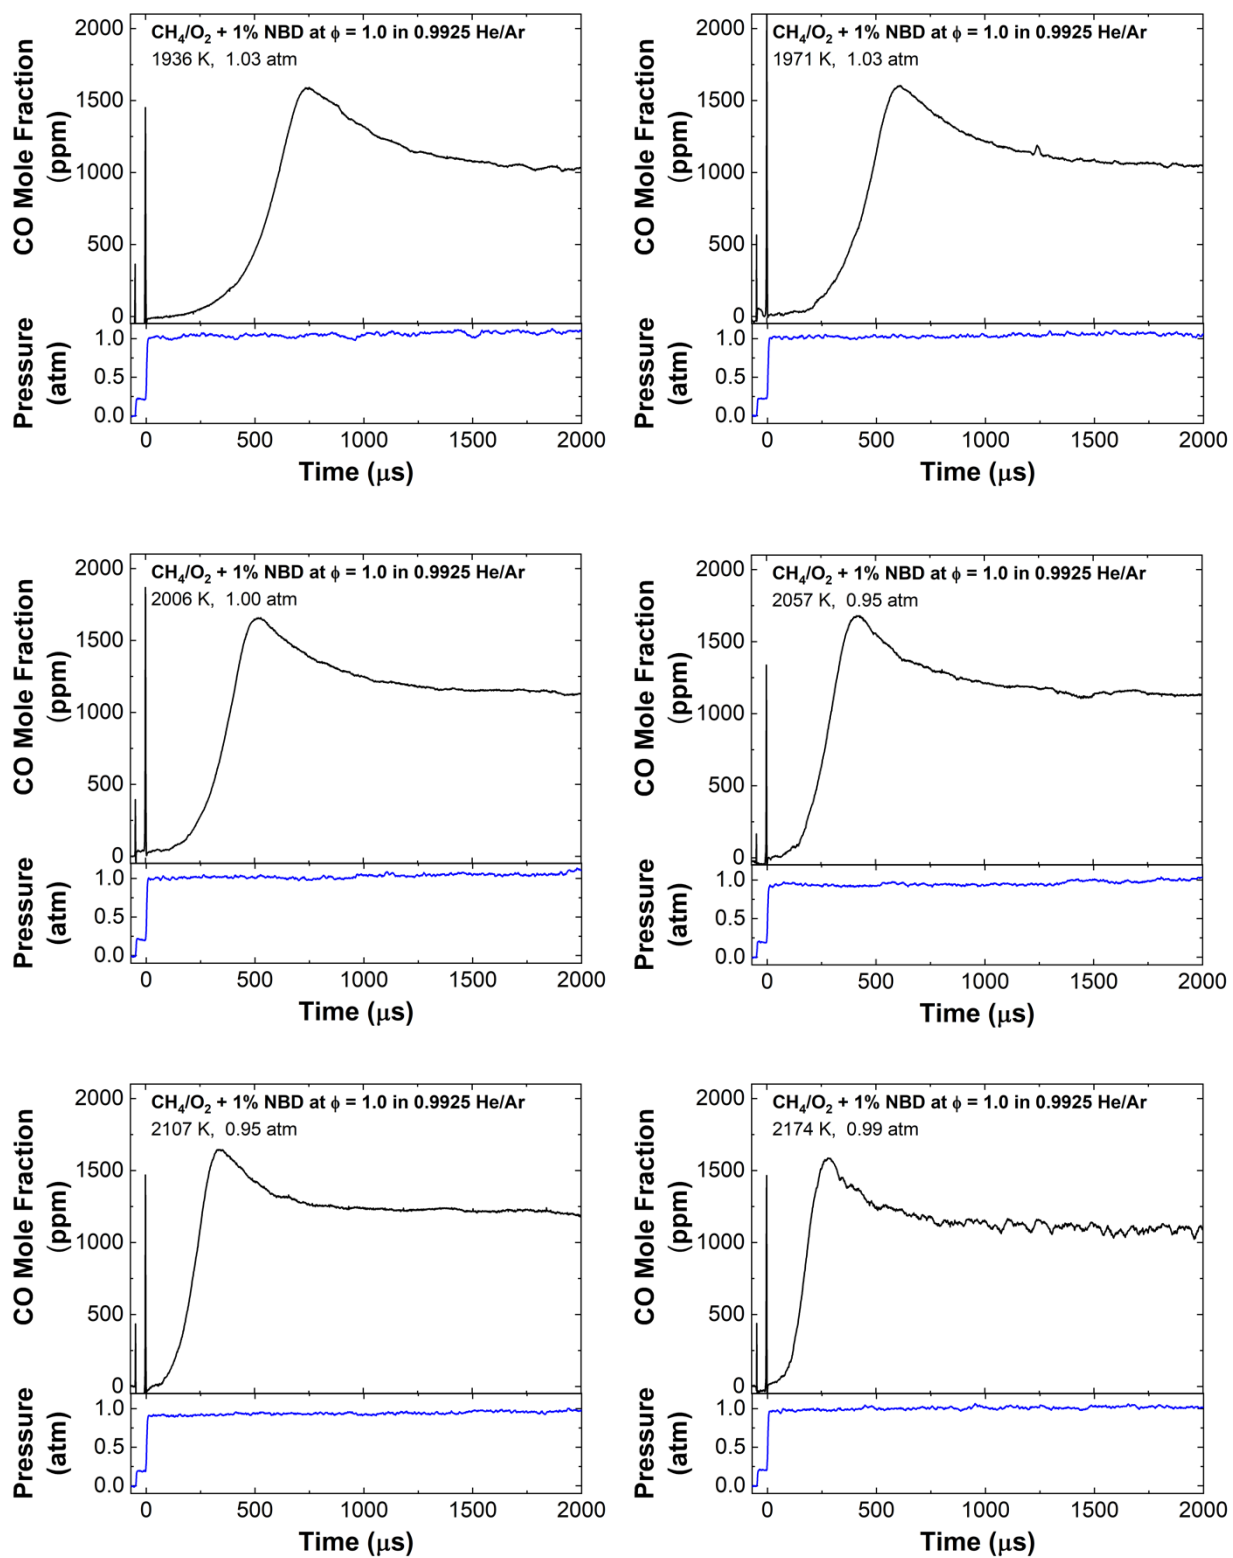

**Figure S2.** Experimental CO time-history profiles for the oxidation of  $\text{CH}_4 + 1\% \text{ NBD}$  at  $\phi = 1.01$  in 99.25% He/Ar.

8/ CO time-history profiles: methane oxidation + 2% NBD,  $\phi = 1.0$ ,  $T = 1778 - 2091$  K,  $P = 0.97 - 1.07$  atm

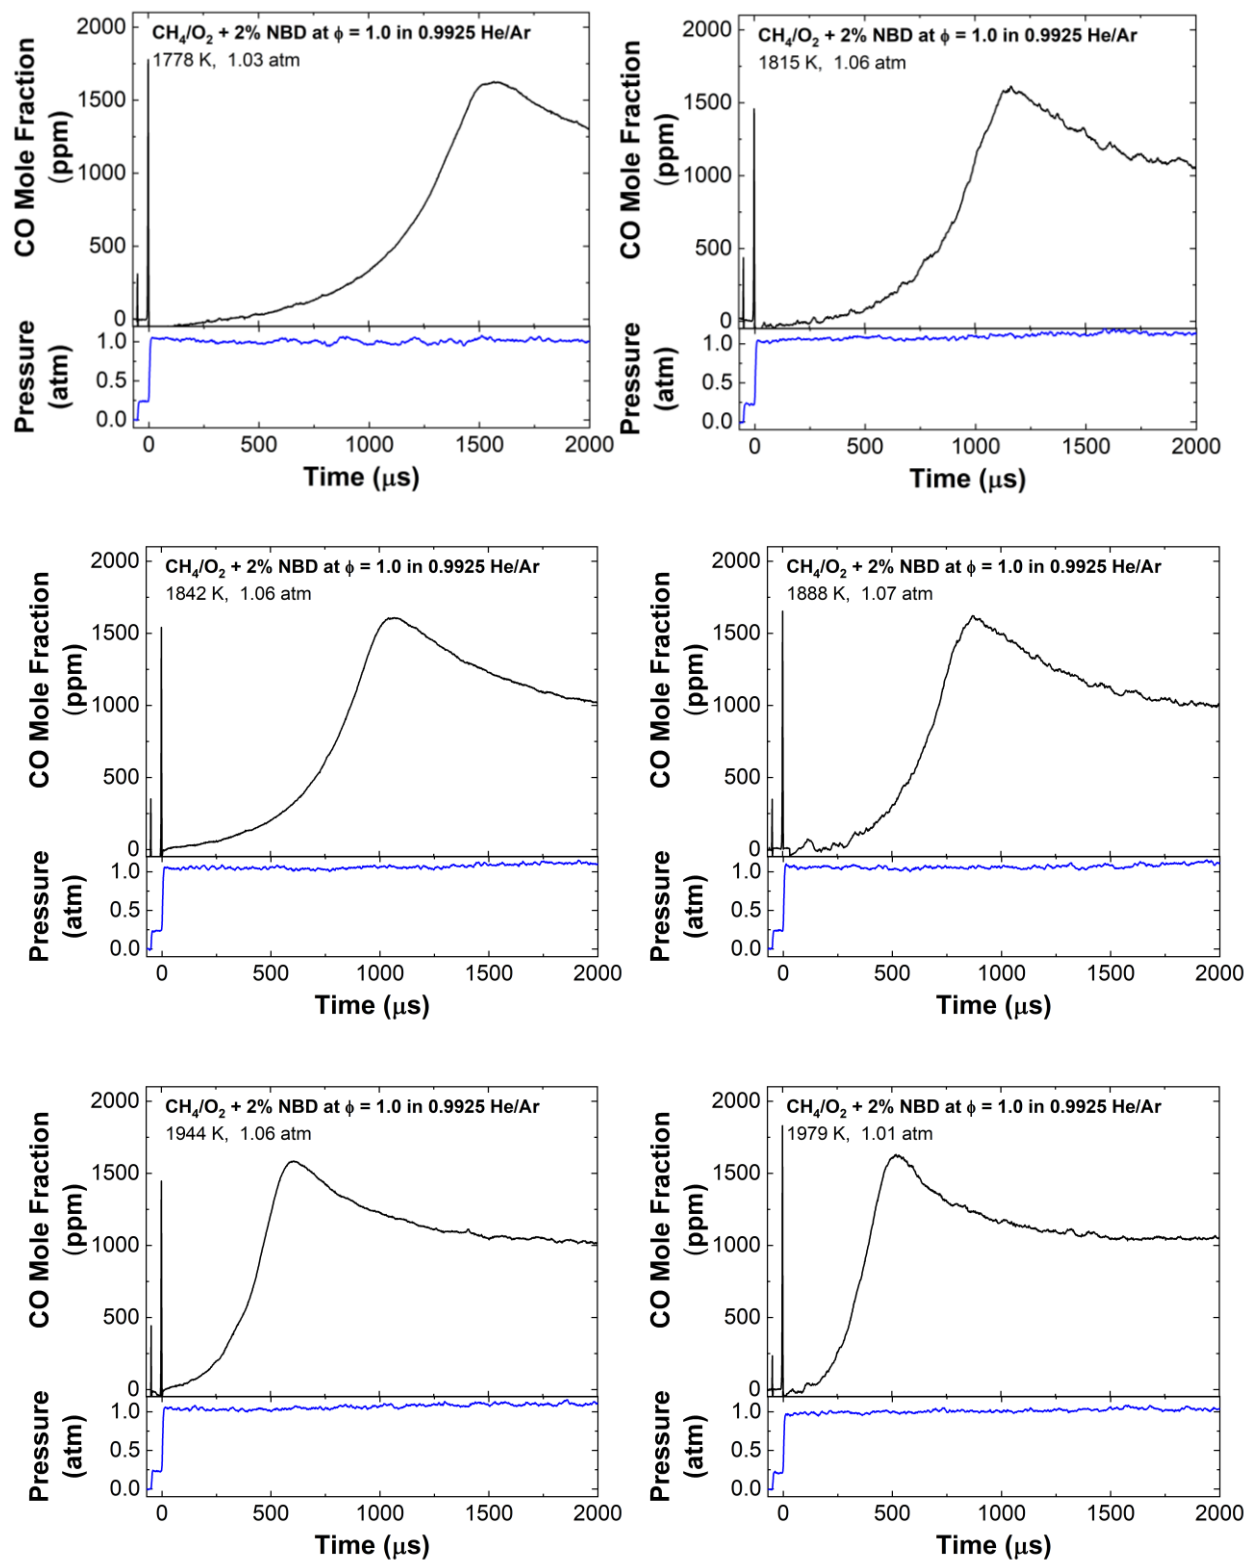

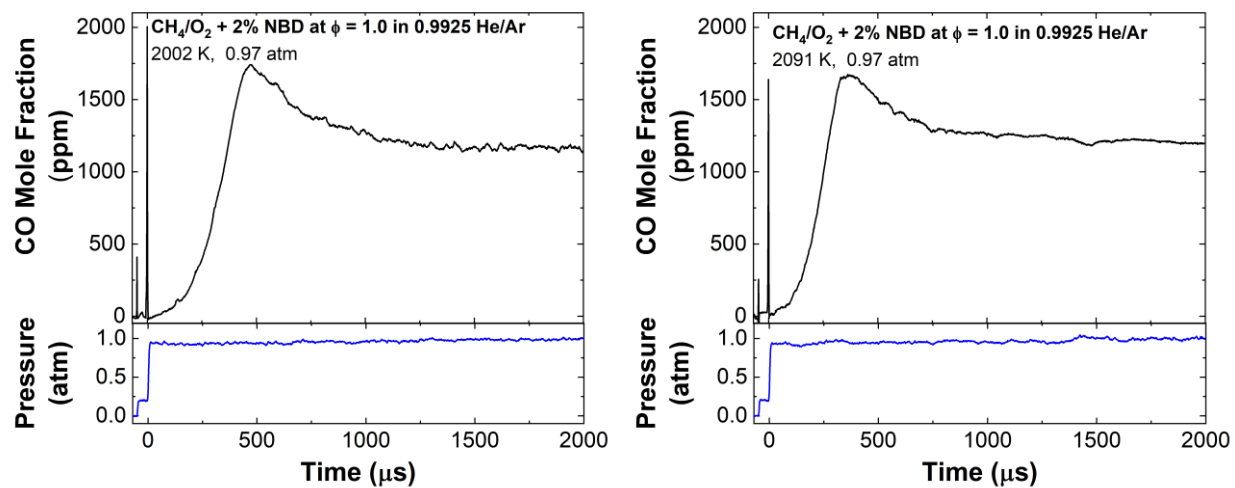

**Figure S3.** Experimental CO time-history profiles for the oxidation of  $\text{CH}_4 + 2\% \text{ NBD}$  at  $\phi = 1.0$  in 99.25% He/Ar.
